# Supplementary material for: Speed-dependent and mode-dependent modulations of spatiotemporal modules in human locomotion extracted via tensor decomposition
Source: PubMed Central journal article supplement (PMC6971295; doi:10.1038/s41598-020-57513-w), 2020-01-20
Supplement: 41598_2020_57513_MOESM1_ESM.pdf [file 41598_2020_57513_MOESM1_ESM.pdf]

Supplementary materials for “Speed-dependent and mode-dependent modulations of spatiotemporal modules in human locomotion extracted via tensor decomposition”

**Ken Takiyama<sup>1\*</sup>, Hikaru Yokoyama<sup>1, 2\*</sup>, Naotsugu Kaneko<sup>3</sup>, Kimitaka Nakazawa<sup>3</sup>**

<sup>1</sup>Tokyo University of Agriculture and Technology, Department of Electrical Engineering and Computer Science, Nakacho, Koganei Tokyo, Japan

<sup>2</sup>Rehabilitation Engineering Laboratory, Toronto Rehabilitation Institute, University Health Network, Toronto, Ontario, Canada

<sup>3</sup>The University of Tokyo, Department of Life Sciences, Graduate School of Arts and Sciences, Tokyo, Japan

\* ... equally contributed.

Correspondence should be addressed to K.T. (t.j.ken.takiyama@gmail.com).

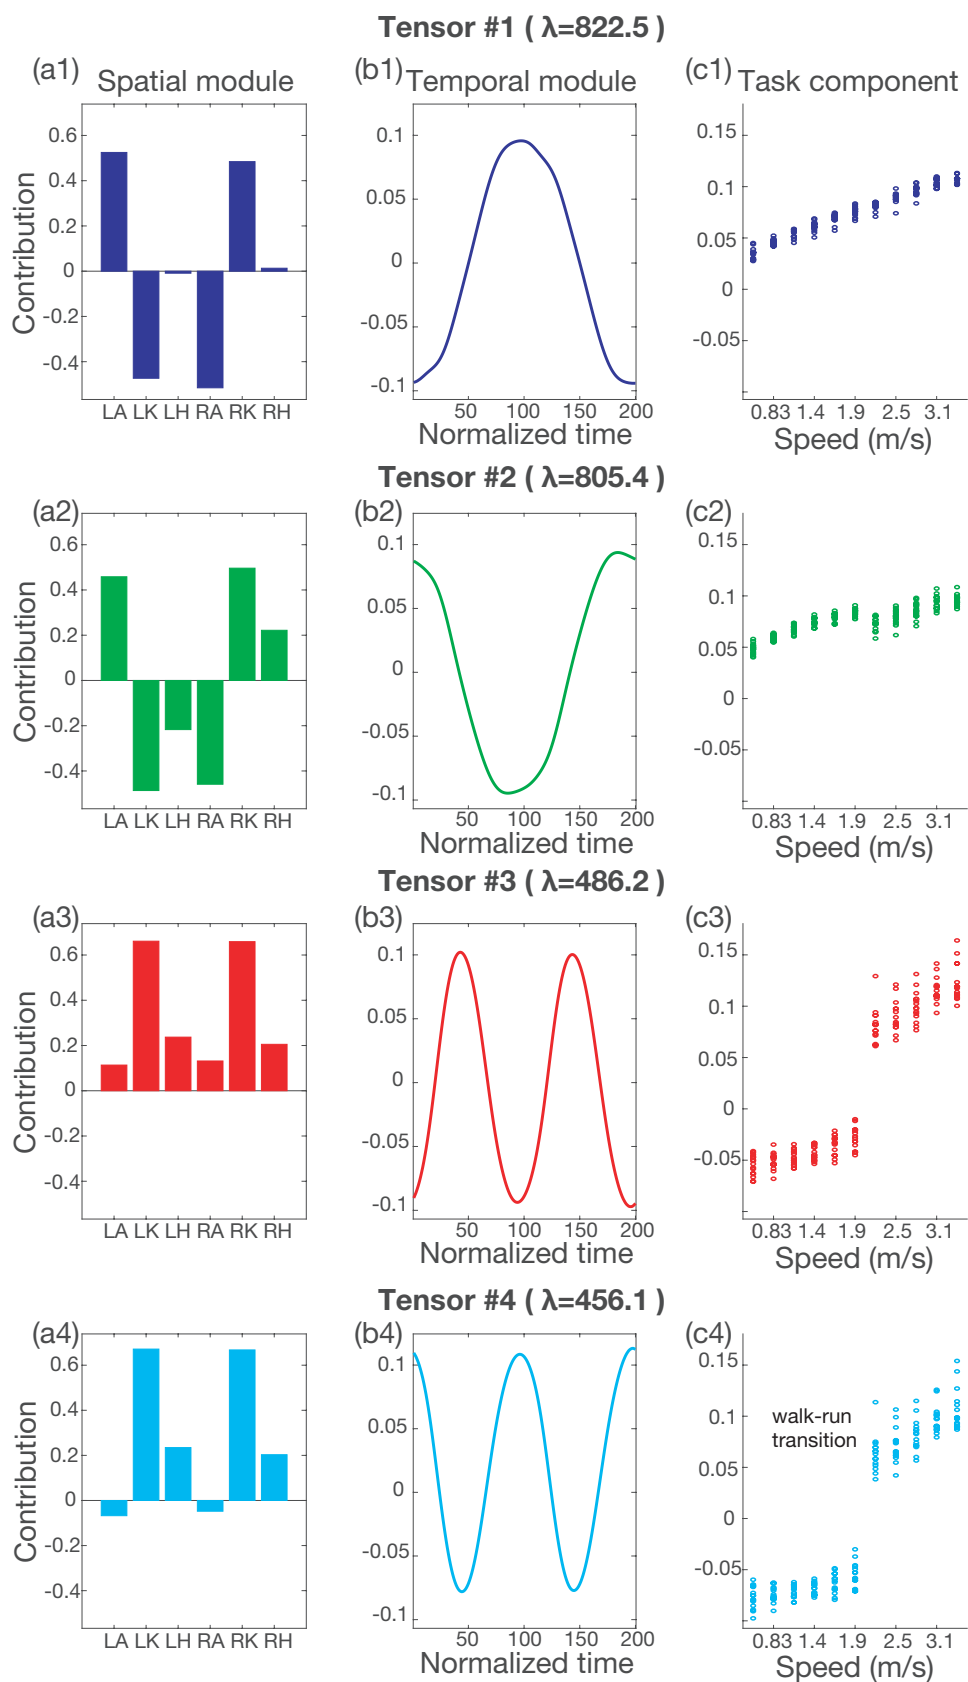

**Fig. S1** Tensor decomposition for joint angle data. The number of modules was determined based on 90% explained variance.

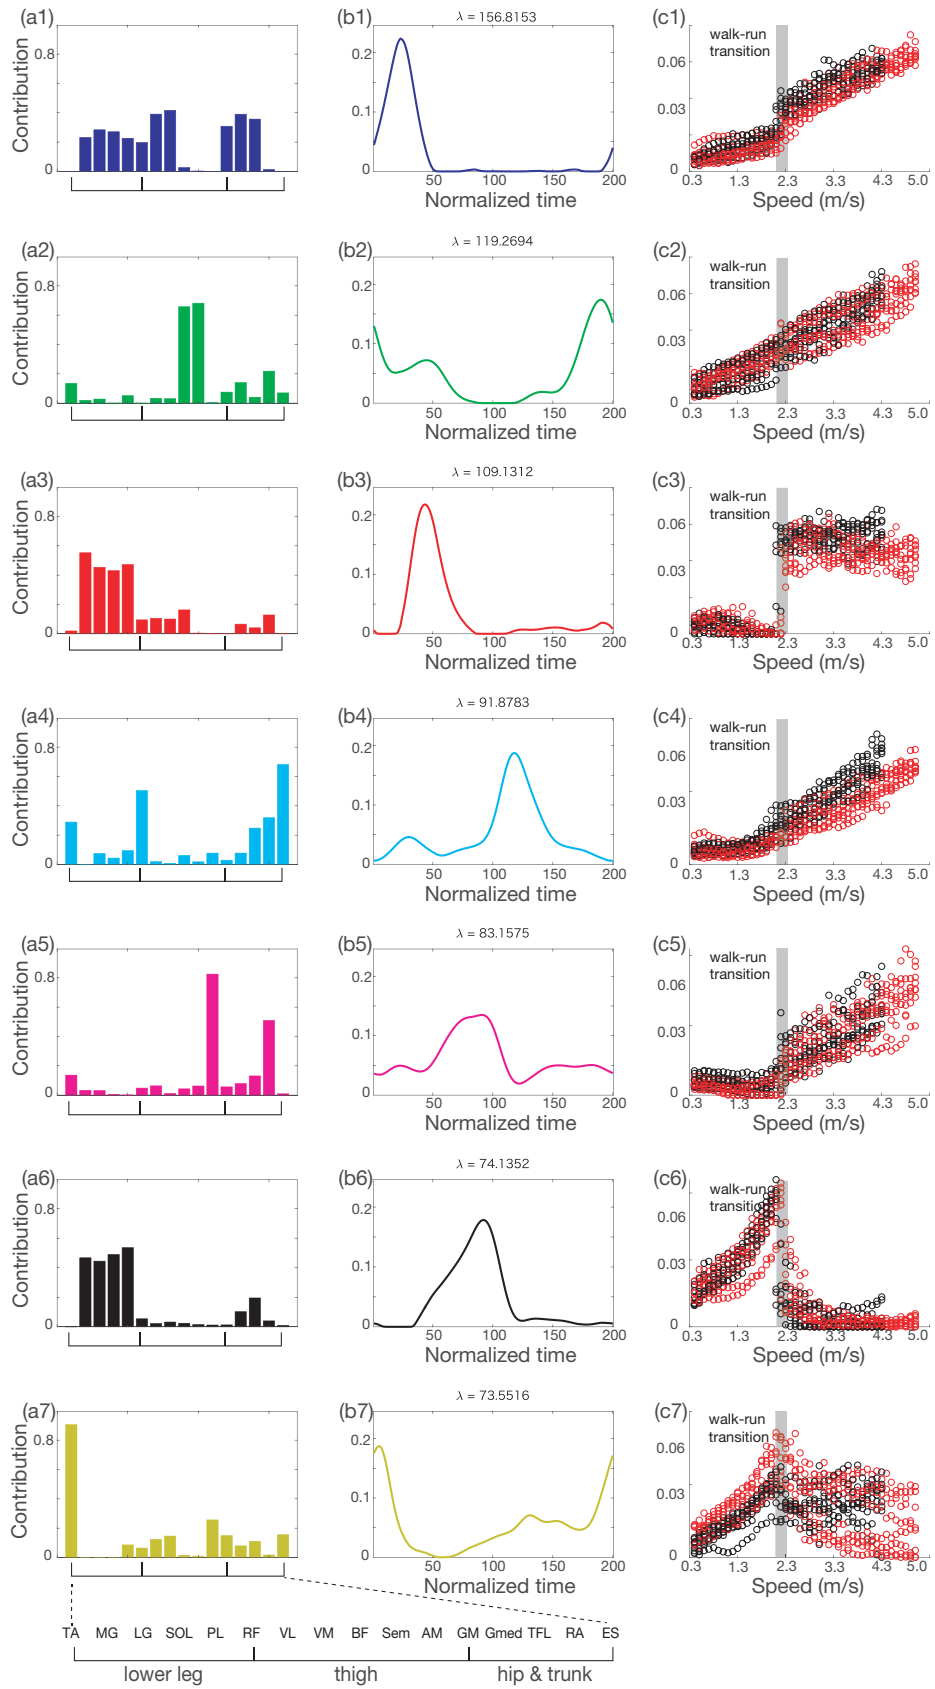

**Fig. S2** Tensor decomposition for EMG data. The number of modules was determined based on 75% explained variance.

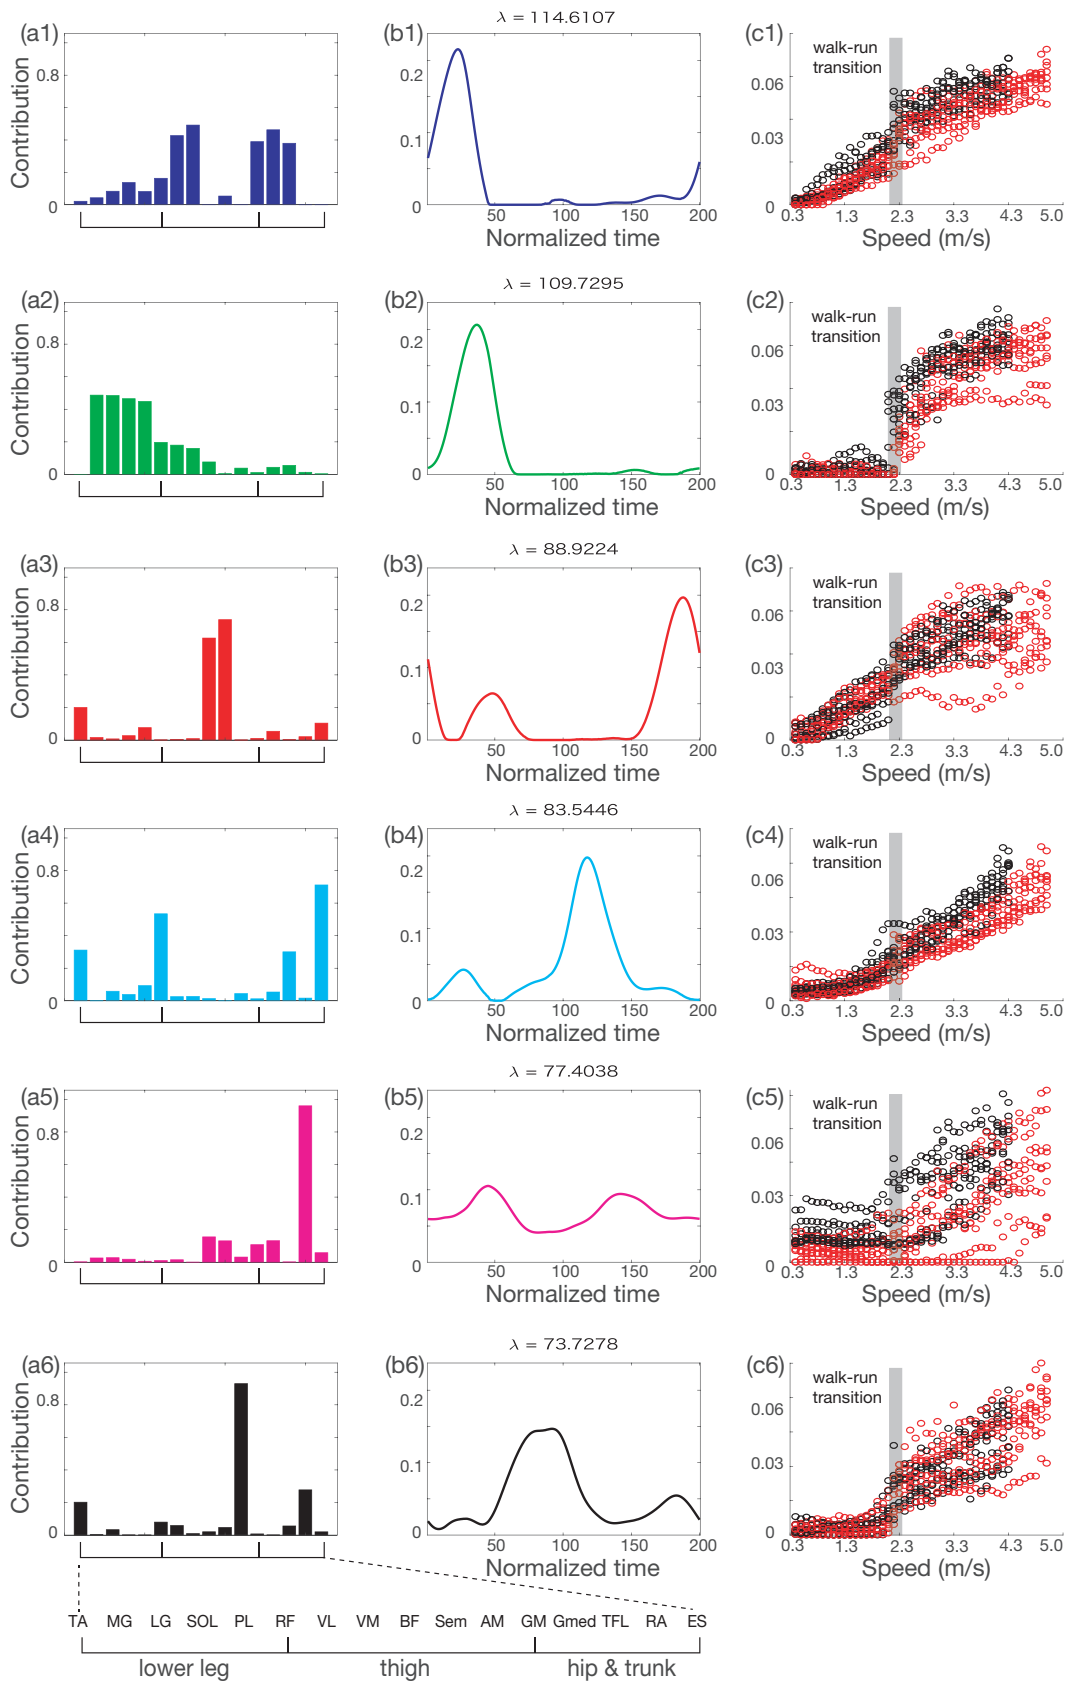

**Fig. S3** Tensor decomposition for EMG data. The number of modules was determined based on 80% explained variance. Tensors 1 to 6 are shown.

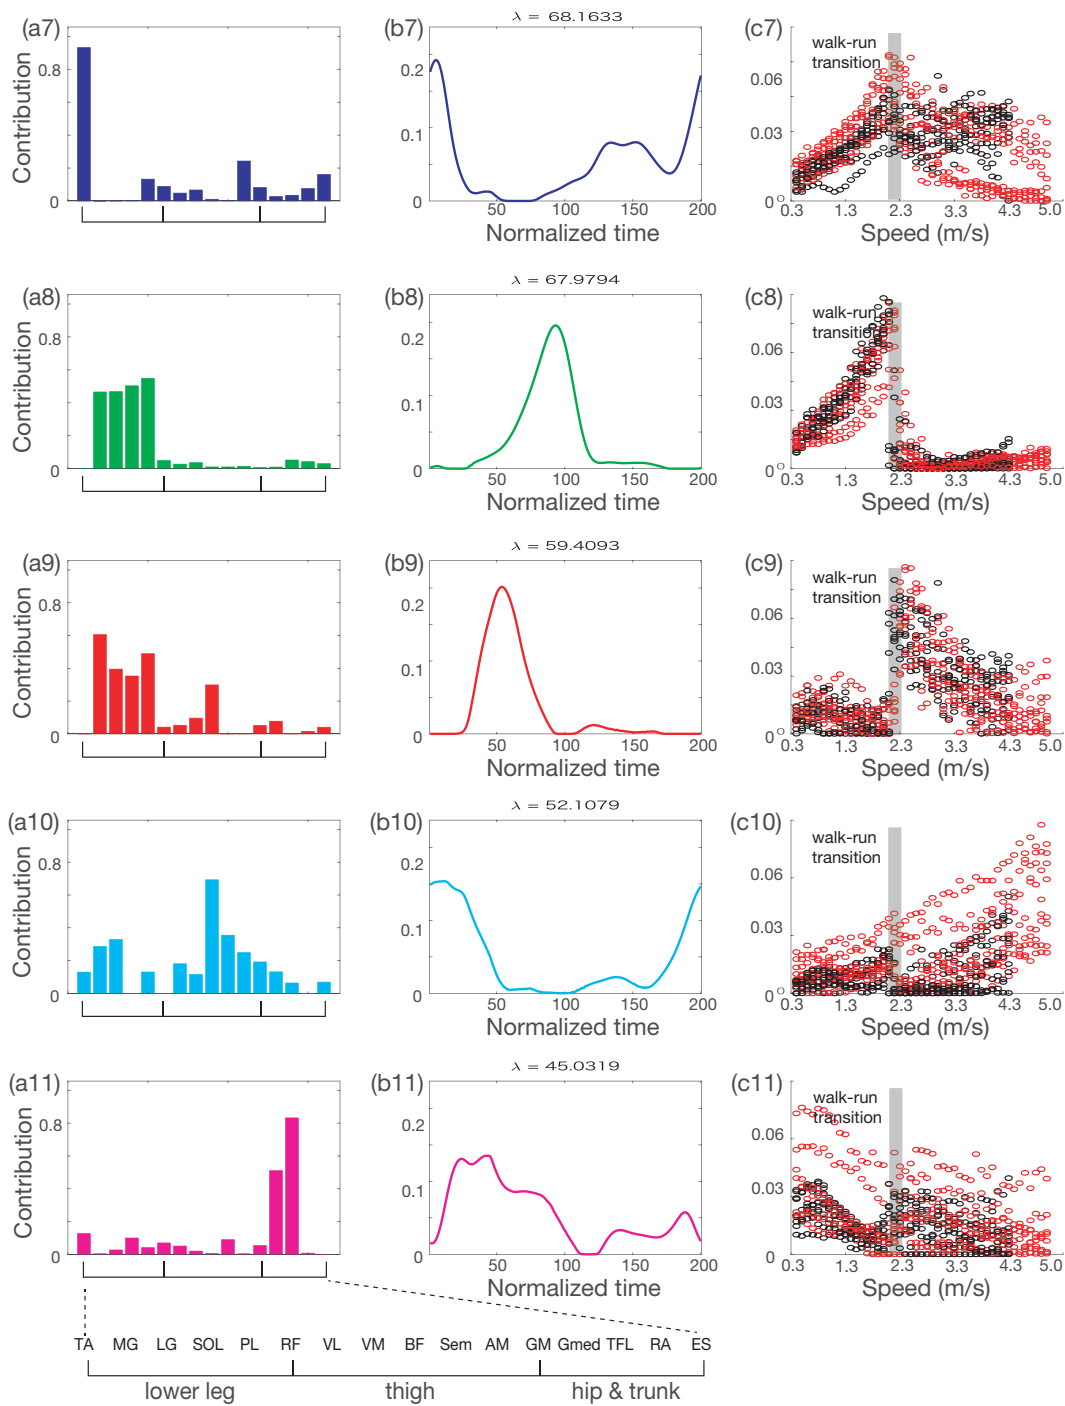

**Fig. S4** Tensor decomposition for EMG data. The number of modules was determined based on 80% explained variance. Tensors 7 to 11 are shown.
